# Supplementary material
Source: MDPI journal article supplement (https://www.mdpi.com/2073-4352/7/9/263)
Supplement: s1 [file s1]

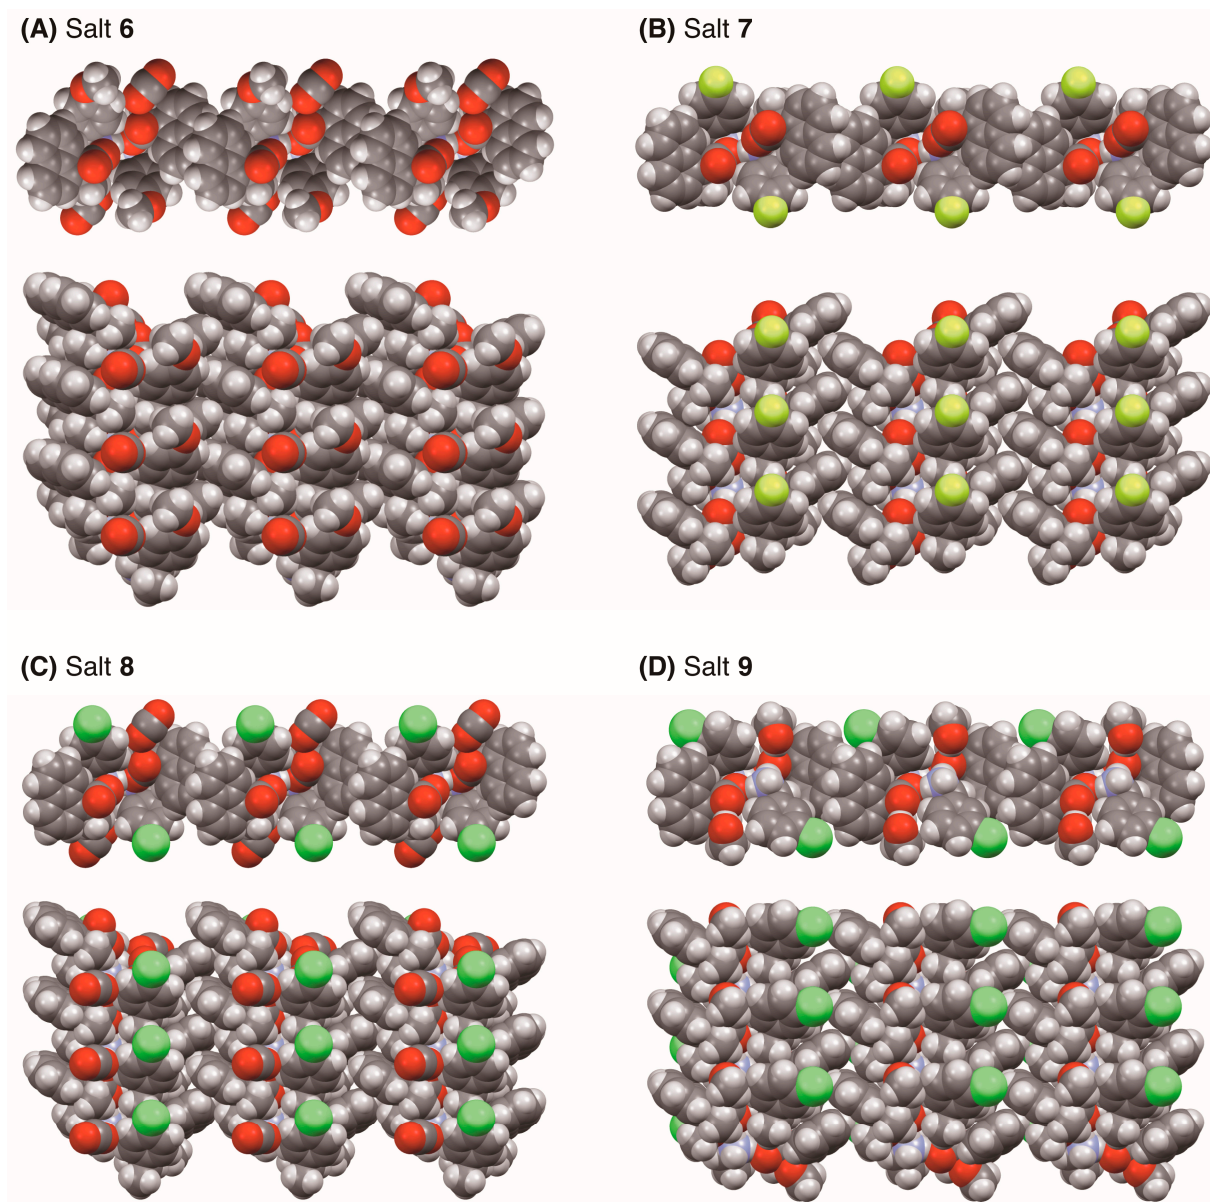

**Figure S1.** Top and side views of the sheet structures consisting of 2<sub>1</sub> columns in salts 6–9 (space-filling model).
